# Supplementary material for: SARS-CoV-2 seroprevalence in Kenyan Children and Adolescents living with HIV
Source: Research Square preprint supplement (doi:10.21203/rs.3.rs-7313421/v1), 2025-08-22
Supplement: Supplementary file 1 [file d4103e82243dee1e1ddf04ee.docx]

**Supplemental Table 1. Demographics and COVID questionnaire responses among participants by SARS-CoV-2 antibody testing results availability.**

|  |  | **Overall** | **SARS-CoV-2 antibody testing obtained** | **SARS-CoV-2 antibody testing not obtained** |
| --- | --- | --- | --- | --- |
| **Gender** | **Female** | 214/432, 50% | 120/241, 50% | 94/191, 49% |
|  | **Male** | 218/432, 50% | 121/241, 50% | 97/191, 51% |
|  |  |  |  |  |
| **Age Group** | **<15** | 102/432, 24% | 66/241, 27% | 36/191, 19% |
|  | **15-17** | 139/432, 32% | 82/241, 34% | 57/191, 30% |
|  | **>=18** | 191/432, 44% | 93/241, 39% | 98/191, 51% |
|  |  |  |  |  |
| **Clinic Site** | **Kitale** | 46/432, 11% | 31/241, 13% | 15/191, 8% |
|  | **MTRH** | 257/432, 59% | 128/241, 53% | 129/191, 68% |
|  | **Turbo** | 68/432, 16% | 47/241, 20% | 21/191, 11% |
|  | **Webuye** | 61/432, 14% | 35/241, 15% | 26/191, 14% |
|  |  |  |  |  |
| **CD4 Count (cells/μL)** |  | 779 (33, 2557) | 839 (33, 2557) | 723 (39, 2133) |
|  |  |  |  |  |
| **During the past 2 months, have you felt ill?** | **No** | 299/432, 69% | 168/241, 70% | 131/191, 69% |
|  | **Yes** | 133/432, 31% | 73/241, 30% | 60/191, 31% |
|  |  |  |  |  |
| **During the past 2 months, have you needed to be hospitalized for any reason?** | **No** | 427/432, 99% | 237/241, 98% | 190/191, 99% |
|  | **Yes** | 4/432, 1% | 3/241, 1% | 1/191, 1% |
|  |  |  |  |  |
| **Are you enrolled in school?** | **No** | 64/432, 15% | 34/241, 14% | 30/191, 16% |
|  | **Yes** | 368/432, 85% | 207/241, 86% | 161/191, 84% |
|  |  |  |  |  |
| **Prior to the current outbreak, were you working or earning income?** | **No** | 361/432, 84% | 203/241, 84% | 158/191, 83% |
|  | **Yes** | 71/432, 16% | 38/241, 16% | 33/191, 17% |
|  |  |  |  |  |
| **Does this work involve interaction with people of the public?** | **No** | 21/71, 30% | 13/38, 34% | 8/33, 24% |
|  | **Yes** | 50/71, 70% | 25/38, 66% | 25/33, 76% |

**Footnote: Continuous measures are presented as “median (range)”**
